# Supplementary material
Source: publisher figshare collection journal article supplement (https://acs.figshare.com/ndownloader/files/5143660)
Supplement: Supplementary file 1 [file 5143660]

 
data_1

_audit_creation_date                  
_audit_creation_method            SHELXL-97 

_publ_section_references
;
    ENTER OTHER REFERENCES
Molecular Structure Corporation, Rigaku Corporation. (2000). teXsan. 
Single Crystal Structure Analysis Software. Version 1.11.
MSC, 3200 Research Forest Drive, The Woodlands, TX 77381, USA.
Rigaku, 3-9-12 Akishima, Tokyo, Japan.
;

_chemical_name_systematic 
; 
[Ca3(bta)2(H2O)8]-3(H2O)
; 
_chemical_name_common             ? 
_chemical_melting_point           'C24 H40 Ca3 O23 '
_chemical_formula_moiety          ? 
_chemical_formula_sum 
 'C24 H40 Ca3 O23' 
_chemical_formula_weight          816.80 
 
loop_ 
 _atom_type_symbol 
 _atom_type_description 
 _atom_type_scat_dispersion_real 
 _atom_type_scat_dispersion_imag 
 _atom_type_scat_source 
 'C'  'C'   0.0033   0.0016 
 'International Tables Vol C Tables 4.2.6.8 and 6.1.1.4' 
 'H'  'H'   0.0000   0.0000 
 'International Tables Vol C Tables 4.2.6.8 and 6.1.1.4' 
 'O'  'O'   0.0106   0.0060 
 'International Tables Vol C Tables 4.2.6.8 and 6.1.1.4' 
 'Ca'  'Ca'   0.2262   0.3064 
 'International Tables Vol C Tables 4.2.6.8 and 6.1.1.4' 
 
_symmetry_cell_setting            triclinic
_symmetry_space_group_name_H-M    'P -1         '
_symmetry_Int_Tables_number            2

loop_ 
 _symmetry_equiv_pos_as_xyz 
 'x, y, z' 
 '-x, -y, -z' 
 
_cell_length_a                    8.3045(10) 
_cell_length_b                    10.4883(10) 
_cell_length_c                    11.0184(16) 
_cell_angle_alpha                 102.703(3) 
_cell_angle_beta                  100.001(4) 
_cell_angle_gamma                 108.842(7) 
_cell_volume                      854.36(18) 
_cell_formula_units_Z             1 
_cell_measurement_temperature     200 
_cell_measurement_reflns_used     2265
_cell_measurement_theta_min       2.7
_cell_measurement_theta_max       27.5
 
_exptl_crystal_description        'block'
_exptl_crystal_colour             'pale yellow'
_exptl_crystal_size_max           0.100
_exptl_crystal_size_mid           0.100
_exptl_crystal_size_min           0.100
_exptl_crystal_density_meas       ? 
_exptl_crystal_density_diffrn     1.588 
_exptl_crystal_density_method     'not measured' 
_exptl_crystal_F_000              428 
_exptl_absorpt_coefficient_mu     0.576 
_exptl_absorpt_correction_type    multi-scan
_exptl_absorpt_correction_T_min   0.533
_exptl_absorpt_correction_T_max   0.944
_exptl_absorpt_process_details    '(Higashi, 1995)'
 
_exptl_special_details 
; 
 ? 
; 
 
_diffrn_ambient_temperature       200
_diffrn_radiation_wavelength      0.71069 
_diffrn_radiation_type            MoK\a 
_diffrn_radiation_source          'fine-focus sealed tube' 
_diffrn_radiation_monochromator   graphite 
_diffrn_measurement_device_type   'Rigaku RAXIS-RAPID Imaging Plate'
_diffrn_measurement_method        \w
_diffrn_detector_area_resol_mean  10.00
_diffrn_standards_number          ? 
_diffrn_standards_interval_count  ? 
_diffrn_standards_interval_time   ? 
_diffrn_standards_decay_%         ? 
_diffrn_reflns_number             5451 
_diffrn_reflns_av_R_equivalents   0.0546 
_diffrn_reflns_av_sigmaI/netI     0.0910 
_diffrn_reflns_limit_h_min        -10 
_diffrn_reflns_limit_h_max        10 
_diffrn_reflns_limit_k_min        -13 
_diffrn_reflns_limit_k_max        13 
_diffrn_reflns_limit_l_min        -14 
_diffrn_reflns_limit_l_max        14 
_diffrn_reflns_theta_min          1.96 
_diffrn_reflns_theta_max          27.48 
_reflns_number_total              3721 
_reflns_number_gt                 2751 
_reflns_threshold_expression      >2sigma(I) 
 
_computing_data_collection        ? 
_computing_cell_refinement        ? 
_computing_data_reduction         ? 
_computing_structure_solution     'SIR92 (Altomre, 1994)' 
_computing_structure_refinement   'SHELXL-97 (Sheldrick, 1997)' 
_computing_molecular_graphics     ? 
_computing_publication_material   ? 
 
_refine_special_details 
; 
 Refinement of F^2^ against ALL reflections.  The weighted R-factor wR and 
 goodness of fit S are based on F^2^, conventional R-factors R are based 
 on F, with F set to zero for negative F^2^. The threshold expression of 
 F^2^ > 2sigma(F^2^) is used only for calculating R-factors(gt) etc. and is 
 not relevant to the choice of reflections for refinement.  R-factors based 
 on F^2^ are statistically about twice as large as those based on F, and R- 
 factors based on ALL data will be even larger. 
; 
 
_refine_ls_structure_factor_coef  Fsqd  
_refine_ls_matrix_type            full 
_refine_ls_weighting_scheme       calc  
_refine_ls_weighting_details 
 'calc w=1/[\s^2^(Fo^2^)+(0.1702P)^2^+0.0000P] where P=(Fo^2^+2Fc^2^)/3' 
_atom_sites_solution_primary      direct 
_atom_sites_solution_secondary    difmap 
_atom_sites_solution_hydrogens    geom 
_refine_ls_hydrogen_treatment     mixed 
_refine_ls_extinction_method      none 
_refine_ls_extinction_coef        ? 
_refine_ls_number_reflns          3721 
_refine_ls_number_parameters      229 
_refine_ls_number_restraints      0 
_refine_ls_R_factor_all           0.0921 
_refine_ls_R_factor_gt            0.0612 
_refine_ls_wR_factor_ref          0.2334 
_refine_ls_wR_factor_gt           0.1878 
_refine_ls_goodness_of_fit_ref    1.073 
_refine_ls_restrained_S_all       1.073 
_refine_ls_shift/su_max           0.000 
_refine_ls_shift/su_mean          0.000 
 
loop_ 
 _atom_site_label 
 _atom_site_type_symbol 
 _atom_site_fract_x 
 _atom_site_fract_y 
 _atom_site_fract_z 
 _atom_site_U_iso_or_equiv 
 _atom_site_adp_type 
 _atom_site_occupancy 
 _atom_site_symmetry_multiplicity 
 _atom_site_calc_flag 
 _atom_site_refinement_flags 
 _atom_site_disorder_assembly 
 _atom_site_disorder_group 
Ca1 Ca -0.49616(9) 0.11075(7) 0.37873(7) 0.0182(2) Uani 1 1 d . . . 
Ca2 Ca -0.5000 0.5000 0.5000 0.0281(3) Uani 1 2 d S . . 
O1 O -0.4433(4) 0.1225(3) 0.6113(3) 0.0269(6) Uani 1 1 d . . . 
O2 O -0.4327(6) 0.3156(3) 0.5654(3) 0.0461(10) Uani 1 1 d . . . 
O3 O 0.3324(8) 0.4658(4) 0.6594(6) 0.110(3) Uani 1 1 d . . . 
O4 O 0.4748(5) 0.6843(3) 0.6898(3) 0.0380(8) Uani 1 1 d . . . 
O5 O 0.1269(4) 0.0507(3) 0.7778(3) 0.0301(7) Uani 1 1 d . . . 
O6 O 0.3052(9) 0.0535(8) 0.9448(4) 0.122(3) Uani 1 1 d . . . 
O7 O -0.7909(4) 0.0848(3) 0.3738(3) 0.0321(7) Uani 1 1 d . . . 
H10 H -0.8185 0.0924 0.4488 0.038 Uiso 1 1 d . . . 
H11 H -0.8842 0.0098 0.3191 0.038 Uiso 1 1 d . . . 
O8 O -0.5342(4) 0.0207(3) 0.1610(3) 0.0309(7) Uani 1 1 d . . . 
H12 H -0.5821 0.0366 0.1005 0.037 Uiso 1 1 d . . . 
H13 H -0.4746 -0.0172 0.1333 0.037 Uiso 1 1 d . . . 
O9 O -0.1968(4) 0.1403(3) 0.3971(3) 0.0330(7) Uani 1 1 d . . . 
H14 H -0.1669 0.0804 0.3449 0.040 Uiso 1 1 d . . . 
H15 H -0.1032 0.1664 0.4741 0.040 Uiso 1 1 d . . . 
O10 O -0.2059(5) 0.6424(5) 0.6345(5) 0.0635(12) Uani 1 1 d . . . 
O11 O 0.0000 0.5000 0.5000 0.116(4) Uani 1 2 d S . . 
O12 O 0.1106(4) 0.1917(3) 0.5905(3) 0.0292(6) Uani 1 1 d . . . 
H16 H 0.1166 0.1547 0.6698 0.035 Uiso 1 1 d . . . 
H17 H 0.2088 0.2785 0.6367 0.035 Uiso 1 1 d . . . 
C1 C -0.1459(5) 0.3605(4) 0.8312(3) 0.0223(8) Uani 1 1 d . . . 
C2 C -0.0196(5) 0.4753(4) 0.8148(4) 0.0228(8) Uani 1 1 d . . . 
H1 H -0.0559 0.5386 0.7778 0.027 Uiso 1 1 calc R . . 
C3 C 0.1585(5) 0.4992(4) 0.8514(4) 0.0245(8) Uani 1 1 d . . . 
C4 C 0.2091(5) 0.4063(4) 0.9062(4) 0.0252(8) Uani 1 1 d . . . 
H2 H 0.3307 0.4214 0.9318 0.030 Uiso 1 1 calc R . . 
C5 C 0.0849(5) 0.2917(4) 0.9241(4) 0.0238(8) Uani 1 1 d . . . 
C6 C -0.0935(5) 0.2685(4) 0.8852(4) 0.0226(8) Uani 1 1 d . . . 
H3 H -0.1794 0.1893 0.8958 0.027 Uiso 1 1 calc R . . 
C11 C -0.3394(5) 0.3349(4) 0.7880(4) 0.0255(8) Uani 1 1 d . . . 
H4 H -0.4048 0.2814 0.8394 0.031 Uiso 1 1 calc R . . 
H5 H -0.3548 0.4263 0.8023 0.031 Uiso 1 1 calc R . . 
C12 C -0.4120(5) 0.2527(4) 0.6467(4) 0.0213(7) Uani 1 1 d . . . 
C31 C 0.2946(6) 0.6238(4) 0.8318(4) 0.0311(9) Uani 1 1 d . . . 
H6 H 0.2405 0.6931 0.8200 0.037 Uiso 1 1 calc R . . 
H7 H 0.3933 0.6697 0.9112 0.037 Uiso 1 1 calc R . . 
C32 C 0.3689(5) 0.5886(4) 0.7185(4) 0.0265(8) Uani 1 1 d . . . 
C51 C 0.1384(6) 0.1920(5) 0.9844(4) 0.0294(9) Uani 1 1 d . . . 
H8 H 0.0381 0.1360 1.0119 0.035 Uiso 1 1 calc R . . 
H9 H 0.2372 0.2473 1.0627 0.035 Uiso 1 1 calc R . . 
C52 C 0.1950(5) 0.0913(5) 0.8958(4) 0.0295(9) Uani 1 1 d . . . 
 
loop_ 
 _atom_site_aniso_label 
 _atom_site_aniso_U_11 
 _atom_site_aniso_U_22 
 _atom_site_aniso_U_33 
 _atom_site_aniso_U_23 
 _atom_site_aniso_U_13 
 _atom_site_aniso_U_12 
Ca1 0.0217(4) 0.0162(4) 0.0176(4) 0.0055(3) 0.0050(3) 0.0080(3) 
Ca2 0.0423(7) 0.0192(5) 0.0363(7) 0.0145(5) 0.0234(5) 0.0181(5) 
O1 0.0397(15) 0.0182(13) 0.0213(14) 0.0055(10) 0.0055(12) 0.0105(12) 
O2 0.096(3) 0.0224(15) 0.0203(15) 0.0077(12) 0.0028(17) 0.0287(17) 
O3 0.163(5) 0.0237(19) 0.131(5) -0.009(2) 0.130(5) -0.008(3) 
O4 0.056(2) 0.0231(15) 0.046(2) 0.0172(13) 0.0320(17) 0.0144(14) 
O5 0.0314(15) 0.0331(15) 0.0246(15) 0.0034(12) 0.0021(12) 0.0169(13) 
O6 0.167(6) 0.261(8) 0.030(2) 0.041(3) 0.028(3) 0.196(7) 
O7 0.0205(13) 0.0347(16) 0.0351(17) 0.0065(13) 0.0069(12) 0.0058(12) 
O8 0.0421(16) 0.0341(16) 0.0185(14) 0.0087(12) 0.0086(12) 0.0158(13) 
O9 0.0271(14) 0.0401(17) 0.0293(16) 0.0035(13) 0.0029(12) 0.0164(13) 
O10 0.043(2) 0.068(3) 0.102(4) 0.061(3) 0.021(2) 0.025(2) 
O11 0.072(5) 0.155(9) 0.123(8) 0.015(7) 0.041(5) 0.055(6) 
O12 0.0317(14) 0.0280(15) 0.0223(14) 0.0096(11) 0.0041(12) 0.0040(12) 
C1 0.0258(18) 0.0231(17) 0.0153(17) 0.0004(13) 0.0049(14) 0.0094(15) 
C2 0.0280(18) 0.0207(17) 0.0204(19) 0.0046(14) 0.0079(15) 0.0103(15) 
C3 0.0284(18) 0.0224(18) 0.0189(19) 0.0015(14) 0.0090(15) 0.0065(15) 
C4 0.0241(18) 0.0284(19) 0.0197(19) 0.0028(15) 0.0050(14) 0.0088(15) 
C5 0.0277(18) 0.0221(17) 0.0194(19) 0.0003(14) 0.0060(15) 0.0106(15) 
C6 0.0249(17) 0.0216(17) 0.0200(18) 0.0063(14) 0.0080(14) 0.0060(14) 
C11 0.0266(18) 0.0273(19) 0.0203(19) 0.0012(15) 0.0037(15) 0.0126(16) 
C12 0.0223(16) 0.0173(16) 0.0221(19) 0.0048(14) 0.0040(14) 0.0063(14) 
C31 0.040(2) 0.0199(18) 0.033(2) 0.0053(16) 0.0192(19) 0.0071(17) 
C32 0.0303(19) 0.0224(18) 0.030(2) 0.0093(15) 0.0105(16) 0.0112(16) 
C51 0.036(2) 0.034(2) 0.022(2) 0.0101(16) 0.0080(17) 0.0172(18) 
C52 0.0293(19) 0.044(2) 0.024(2) 0.0145(18) 0.0082(16) 0.0213(19) 
 
_geom_special_details 
; 
 All esds (except the esd in the dihedral angle between two l.s. planes) 
 are estimated using the full covariance matrix.  The cell esds are taken 
 into account individually in the estimation of esds in distances, angles 
 and torsion angles; correlations between esds in cell parameters are only 
 used when they are defined by crystal symmetry.  An approximate (isotropic) 
 treatment of cell esds is used for estimating esds involving l.s. planes. 
; 
 
loop_ 
 _geom_bond_atom_site_label_1 
 _geom_bond_atom_site_label_2 
 _geom_bond_distance 
 _geom_bond_site_symmetry_2 
 _geom_bond_publ_flag 
Ca1 O8 2.301(3) . ? 
Ca1 O7 2.364(3) . ? 
Ca1 O1 2.365(3) 2_456 ? 
Ca1 O9 2.370(3) . ? 
Ca1 O4 2.395(3) 2_566 ? 
Ca1 O2 2.464(3) . ? 
Ca1 O1 2.492(3) . ? 
Ca1 C12 2.846(4) . ? 
Ca1 Ca1 3.9033(14) 2_456 ? 
Ca1 Ca2 4.0192(8) . ? 
Ca2 O2 2.396(3) . ? 
Ca2 O2 2.396(3) 2_466 ? 
Ca2 O10 2.410(4) . ? 
Ca2 O10 2.410(4) 2_466 ? 
Ca2 O3 2.440(4) 1_455 ? 
Ca2 O3 2.440(4) 2_566 ? 
Ca2 O4 2.605(3) 1_455 ? 
Ca2 O4 2.605(3) 2_566 ? 
Ca2 C32 2.903(4) 1_455 ? 
Ca2 C32 2.903(4) 2_566 ? 
Ca2 Ca1 4.0192(8) 2_466 ? 
O1 C12 1.259(4) . ? 
O1 Ca1 2.365(3) 2_456 ? 
O2 C12 1.244(5) . ? 
O3 C32 1.219(5) . ? 
O3 Ca2 2.440(4) 1_655 ? 
O4 C32 1.244(5) . ? 
O4 Ca1 2.395(3) 2_566 ? 
O4 Ca2 2.605(3) 1_655 ? 
O5 C52 1.240(5) . ? 
O6 C52 1.201(5) . ? 
O7 H10 0.8893 . ? 
O7 H11 0.9041 . ? 
O8 H12 0.7940 . ? 
O8 H13 0.7888 . ? 
O9 H14 0.8835 . ? 
O9 H15 0.9647 . ? 
O12 H16 1.0315 . ? 
O12 H17 0.9621 . ? 
C1 C6 1.381(5) . ? 
C1 C2 1.389(5) . ? 
C1 C11 1.510(5) . ? 
C2 C3 1.386(5) . ? 
C2 H1 0.9500 . ? 
C3 C4 1.388(6) . ? 
C3 C31 1.513(5) . ? 
C4 C5 1.386(6) . ? 
C4 H2 0.9500 . ? 
C5 C6 1.392(5) . ? 
C5 C51 1.495(6) . ? 
C6 H3 0.9500 . ? 
C11 C12 1.510(5) . ? 
C11 H4 0.9900 . ? 
C11 H5 0.9900 . ? 
C31 C32 1.513(6) . ? 
C31 H6 0.9900 . ? 
C31 H7 0.9900 . ? 
C32 Ca2 2.903(4) 1_655 ? 
C51 C52 1.522(6) . ? 
C51 H8 0.9900 . ? 
C51 H9 0.9900 . ? 
 
loop_ 
 _geom_angle_atom_site_label_1 
 _geom_angle_atom_site_label_2 
 _geom_angle_atom_site_label_3 
 _geom_angle 
 _geom_angle_site_symmetry_1 
 _geom_angle_site_symmetry_3 
 _geom_angle_publ_flag 
O8 Ca1 O7 98.37(11) . . ? 
O8 Ca1 O1 86.49(10) . 2_456 ? 
O7 Ca1 O1 90.70(11) . 2_456 ? 
O8 Ca1 O9 84.96(11) . . ? 
O7 Ca1 O9 176.63(11) . . ? 
O1 Ca1 O9 88.99(11) 2_456 . ? 
O8 Ca1 O4 79.48(11) . 2_566 ? 
O7 Ca1 O4 85.95(11) . 2_566 ? 
O1 Ca1 O4 164.93(12) 2_456 2_566 ? 
O9 Ca1 O4 95.19(11) . 2_566 ? 
O8 Ca1 O2 148.94(11) . . ? 
O7 Ca1 O2 82.24(13) . . ? 
O1 Ca1 O2 124.57(10) 2_456 . ? 
O9 Ca1 O2 95.18(13) . . ? 
O4 Ca1 O2 69.56(11) 2_566 . ? 
O8 Ca1 O1 158.49(10) . . ? 
O7 Ca1 O1 88.68(11) . . ? 
O1 Ca1 O1 73.06(10) 2_456 . ? 
O9 Ca1 O1 88.02(10) . . ? 
O4 Ca1 O1 121.47(10) 2_566 . ? 
O2 Ca1 O1 51.98(9) . . ? 
O8 Ca1 C12 172.52(11) . . ? 
O7 Ca1 C12 86.45(11) . . ? 
O1 Ca1 C12 99.23(10) 2_456 . ? 
O9 Ca1 C12 90.29(11) . . ? 
O4 Ca1 C12 95.24(11) 2_566 . ? 
O2 Ca1 C12 25.83(10) . . ? 
O1 Ca1 C12 26.23(9) . . ? 
O8 Ca1 Ca1 123.84(8) . 2_456 ? 
O7 Ca1 Ca1 89.58(8) . 2_456 ? 
O1 Ca1 Ca1 37.64(7) 2_456 2_456 ? 
O9 Ca1 Ca1 88.12(8) . 2_456 ? 
O4 Ca1 Ca1 156.67(8) 2_566 2_456 ? 
O2 Ca1 Ca1 87.16(8) . 2_456 ? 
O1 Ca1 Ca1 35.42(6) . 2_456 ? 
C12 Ca1 Ca1 61.61(8) . 2_456 ? 
O8 Ca1 Ca2 116.70(8) . . ? 
O7 Ca1 Ca2 72.76(8) . . ? 
O1 Ca1 Ca2 152.74(7) 2_456 . ? 
O9 Ca1 Ca2 106.25(8) . . ? 
O4 Ca1 Ca2 38.33(7) 2_566 . ? 
O2 Ca1 Ca2 33.68(7) . . ? 
O1 Ca1 Ca2 84.78(6) . . ? 
C12 Ca1 Ca2 59.18(7) . . ? 
Ca1 Ca1 Ca2 118.72(3) 2_456 . ? 
O2 Ca2 O2 179.999(1) . 2_466 ? 
O2 Ca2 O10 82.60(13) . . ? 
O2 Ca2 O10 97.40(13) 2_466 . ? 
O2 Ca2 O10 97.40(13) . 2_466 ? 
O2 Ca2 O10 82.60(13) 2_466 2_466 ? 
O10 Ca2 O10 180.0 . 2_466 ? 
O2 Ca2 O3 78.32(18) . 1_455 ? 
O2 Ca2 O3 101.68(18) 2_466 1_455 ? 
O10 Ca2 O3 102.0(2) . 1_455 ? 
O10 Ca2 O3 78.0(2) 2_466 1_455 ? 
O2 Ca2 O3 101.68(18) . 2_566 ? 
O2 Ca2 O3 78.32(18) 2_466 2_566 ? 
O10 Ca2 O3 78.0(2) . 2_566 ? 
O10 Ca2 O3 102.0(2) 2_466 2_566 ? 
O3 Ca2 O3 180.00(15) 1_455 2_566 ? 
O2 Ca2 O4 112.83(11) . 1_455 ? 
O2 Ca2 O4 67.17(11) 2_466 1_455 ? 
O10 Ca2 O4 72.36(14) . 1_455 ? 
O10 Ca2 O4 107.64(14) 2_466 1_455 ? 
O3 Ca2 O4 49.81(11) 1_455 1_455 ? 
O3 Ca2 O4 130.19(11) 2_566 1_455 ? 
O2 Ca2 O4 67.17(11) . 2_566 ? 
O2 Ca2 O4 112.83(11) 2_466 2_566 ? 
O10 Ca2 O4 107.64(14) . 2_566 ? 
O10 Ca2 O4 72.36(14) 2_466 2_566 ? 
O3 Ca2 O4 130.19(11) 1_455 2_566 ? 
O3 Ca2 O4 49.81(11) 2_566 2_566 ? 
O4 Ca2 O4 180.0 1_455 2_566 ? 
O2 Ca2 C32 96.11(11) . 1_455 ? 
O2 Ca2 C32 83.89(11) 2_466 1_455 ? 
O10 Ca2 C32 87.91(14) . 1_455 ? 
O10 Ca2 C32 92.09(14) 2_466 1_455 ? 
O3 Ca2 C32 24.47(12) 1_455 1_455 ? 
O3 Ca2 C32 155.53(12) 2_566 1_455 ? 
O4 Ca2 C32 25.37(10) 1_455 1_455 ? 
O4 Ca2 C32 154.63(10) 2_566 1_455 ? 
O2 Ca2 C32 83.89(11) . 2_566 ? 
O2 Ca2 C32 96.11(11) 2_466 2_566 ? 
O10 Ca2 C32 92.09(14) . 2_566 ? 
O10 Ca2 C32 87.91(14) 2_466 2_566 ? 
O3 Ca2 C32 155.53(12) 1_455 2_566 ? 
O3 Ca2 C32 24.47(12) 2_566 2_566 ? 
O4 Ca2 C32 154.63(10) 1_455 2_566 ? 
O4 Ca2 C32 25.37(10) 2_566 2_566 ? 
C32 Ca2 C32 180.0 1_455 2_566 ? 
O2 Ca2 Ca1 34.76(7) . . ? 
O2 Ca2 Ca1 145.24(7) 2_466 . ? 
O10 Ca2 Ca1 104.76(10) . . ? 
O10 Ca2 Ca1 75.24(10) 2_466 . ? 
O3 Ca2 Ca1 99.51(11) 1_455 . ? 
O3 Ca2 Ca1 80.49(11) 2_566 . ? 
O4 Ca2 Ca1 145.24(7) 1_455 . ? 
O4 Ca2 Ca1 34.76(7) 2_566 . ? 
C32 Ca2 Ca1 122.82(8) 1_455 . ? 
C32 Ca2 Ca1 57.18(8) 2_566 . ? 
O2 Ca2 Ca1 145.24(7) . 2_466 ? 
O2 Ca2 Ca1 34.76(7) 2_466 2_466 ? 
O10 Ca2 Ca1 75.24(10) . 2_466 ? 
O10 Ca2 Ca1 104.76(10) 2_466 2_466 ? 
O3 Ca2 Ca1 80.49(11) 1_455 2_466 ? 
O3 Ca2 Ca1 99.51(11) 2_566 2_466 ? 
O4 Ca2 Ca1 34.76(7) 1_455 2_466 ? 
O4 Ca2 Ca1 145.24(7) 2_566 2_466 ? 
C32 Ca2 Ca1 57.18(8) 1_455 2_466 ? 
C32 Ca2 Ca1 122.82(8) 2_566 2_466 ? 
Ca1 Ca2 Ca1 180.0 . 2_466 ? 
C12 O1 Ca1 159.8(3) . 2_456 ? 
C12 O1 Ca1 92.8(2) . . ? 
Ca1 O1 Ca1 106.94(10) 2_456 . ? 
C12 O2 Ca2 151.6(3) . . ? 
C12 O2 Ca1 94.5(2) . . ? 
Ca2 O2 Ca1 111.56(12) . . ? 
C32 O3 Ca2 99.5(3) . 1_655 ? 
C32 O4 Ca1 141.3(3) . 2_566 ? 
C32 O4 Ca2 90.8(2) . 1_655 ? 
Ca1 O4 Ca2 106.91(12) 2_566 1_655 ? 
Ca1 O7 H10 116.4 . . ? 
Ca1 O7 H11 122.4 . . ? 
H10 O7 H11 103.0 . . ? 
Ca1 O8 H12 131.5 . . ? 
Ca1 O8 H13 122.6 . . ? 
H12 O8 H13 103.7 . . ? 
Ca1 O9 H14 121.5 . . ? 
Ca1 O9 H15 128.7 . . ? 
H14 O9 H15 99.3 . . ? 
H16 O12 H17 92.3 . . ? 
C6 C1 C2 119.6(3) . . ? 
C6 C1 C11 120.2(3) . . ? 
C2 C1 C11 120.2(4) . . ? 
C3 C2 C1 121.1(4) . . ? 
C3 C2 H1 119.4 . . ? 
C1 C2 H1 119.4 . . ? 
C2 C3 C4 118.6(4) . . ? 
C2 C3 C31 120.6(4) . . ? 
C4 C3 C31 120.8(4) . . ? 
C5 C4 C3 121.0(4) . . ? 
C5 C4 H2 119.5 . . ? 
C3 C4 H2 119.5 . . ? 
C4 C5 C6 119.5(4) . . ? 
C4 C5 C51 121.4(4) . . ? 
C6 C5 C51 119.1(4) . . ? 
C1 C6 C5 120.2(3) . . ? 
C1 C6 H3 119.9 . . ? 
C5 C6 H3 119.9 . . ? 
C12 C11 C1 109.9(3) . . ? 
C12 C11 H4 109.7 . . ? 
C1 C11 H4 109.7 . . ? 
C12 C11 H5 109.7 . . ? 
C1 C11 H5 109.7 . . ? 
H4 C11 H5 108.2 . . ? 
O2 C12 O1 120.4(3) . . ? 
O2 C12 C11 119.6(3) . . ? 
O1 C12 C11 120.0(3) . . ? 
O2 C12 Ca1 59.7(2) . . ? 
O1 C12 Ca1 61.0(2) . . ? 
C11 C12 Ca1 171.6(3) . . ? 
C32 C31 C3 115.0(3) . . ? 
C32 C31 H6 108.5 . . ? 
C3 C31 H6 108.5 . . ? 
C32 C31 H7 108.5 . . ? 
C3 C31 H7 108.5 . . ? 
H6 C31 H7 107.5 . . ? 
O3 C32 O4 119.7(4) . . ? 
O3 C32 C31 119.9(4) . . ? 
O4 C32 C31 120.2(3) . . ? 
O3 C32 Ca2 56.0(2) . 1_655 ? 
O4 C32 Ca2 63.8(2) . 1_655 ? 
C31 C32 Ca2 175.9(3) . 1_655 ? 
C5 C51 C52 114.0(3) . . ? 
C5 C51 H8 108.8 . . ? 
C52 C51 H8 108.8 . . ? 
C5 C51 H9 108.8 . . ? 
C52 C51 H9 108.8 . . ? 
H8 C51 H9 107.7 . . ? 
O6 C52 O5 122.5(4) . . ? 
O6 C52 C51 117.6(4) . . ? 
O5 C52 C51 119.9(3) . . ? 
 
loop_ 
 _geom_torsion_atom_site_label_1 
 _geom_torsion_atom_site_label_2 
 _geom_torsion_atom_site_label_3 
 _geom_torsion_atom_site_label_4 
 _geom_torsion 
 _geom_torsion_site_symmetry_1 
 _geom_torsion_site_symmetry_2 
 _geom_torsion_site_symmetry_3 
 _geom_torsion_site_symmetry_4 
 _geom_torsion_publ_flag 
O8 Ca1 Ca2 O2 -167.0(2) . . . . ? 
O7 Ca1 Ca2 O2 102.2(2) . . . . ? 
O1 Ca1 Ca2 O2 47.2(2) 2_456 . . . ? 
O9 Ca1 Ca2 O2 -74.5(2) . . . . ? 
O4 Ca1 Ca2 O2 -152.0(2) 2_566 . . . ? 
O1 Ca1 Ca2 O2 11.94(19) . . . . ? 
C12 Ca1 Ca2 O2 5.9(2) . . . . ? 
Ca1 Ca1 Ca2 O2 22.47(19) 2_456 . . . ? 
O8 Ca1 Ca2 O2 13.0(2) . . . 2_466 ? 
O7 Ca1 Ca2 O2 -77.8(2) . . . 2_466 ? 
O1 Ca1 Ca2 O2 -132.8(3) 2_456 . . 2_466 ? 
O9 Ca1 Ca2 O2 105.5(2) . . . 2_466 ? 
O4 Ca1 Ca2 O2 28.0(2) 2_566 . . 2_466 ? 
O2 Ca1 Ca2 O2 179.999(3) . . . 2_466 ? 
O1 Ca1 Ca2 O2 -168.06(19) . . . 2_466 ? 
C12 Ca1 Ca2 O2 -174.1(2) . . . 2_466 ? 
Ca1 Ca1 Ca2 O2 -157.53(19) 2_456 . . 2_466 ? 
O8 Ca1 Ca2 O10 -114.82(14) . . . . ? 
O7 Ca1 Ca2 O10 154.35(14) . . . . ? 
O1 Ca1 Ca2 O10 99.4(2) 2_456 . . . ? 
O9 Ca1 Ca2 O10 -22.29(14) . . . . ? 
O4 Ca1 Ca2 O10 -99.78(18) 2_566 . . . ? 
O2 Ca1 Ca2 O10 52.2(2) . . . . ? 
O1 Ca1 Ca2 O10 64.11(13) . . . . ? 
C12 Ca1 Ca2 O10 58.05(14) . . . . ? 
Ca1 Ca1 Ca2 O10 74.64(12) 2_456 . . . ? 
O8 Ca1 Ca2 O10 65.18(14) . . . 2_466 ? 
O7 Ca1 Ca2 O10 -25.65(14) . . . 2_466 ? 
O1 Ca1 Ca2 O10 -80.6(2) 2_456 . . 2_466 ? 
O9 Ca1 Ca2 O10 157.71(14) . . . 2_466 ? 
O4 Ca1 Ca2 O10 80.22(18) 2_566 . . 2_466 ? 
O2 Ca1 Ca2 O10 -127.8(2) . . . 2_466 ? 
O1 Ca1 Ca2 O10 -115.89(13) . . . 2_466 ? 
C12 Ca1 Ca2 O10 -121.95(14) . . . 2_466 ? 
Ca1 Ca1 Ca2 O10 -105.36(11) 2_456 . . 2_466 ? 
O8 Ca1 Ca2 O3 140.0(2) . . . 1_455 ? 
O7 Ca1 Ca2 O3 49.1(2) . . . 1_455 ? 
O1 Ca1 Ca2 O3 -5.8(2) 2_456 . . 1_455 ? 
O9 Ca1 Ca2 O3 -127.5(2) . . . 1_455 ? 
O4 Ca1 Ca2 O3 155.0(2) 2_566 . . 1_455 ? 
O2 Ca1 Ca2 O3 -53.0(3) . . . 1_455 ? 
O1 Ca1 Ca2 O3 -41.1(2) . . . 1_455 ? 
C12 Ca1 Ca2 O3 -47.2(2) . . . 1_455 ? 
Ca1 Ca1 Ca2 O3 -30.58(19) 2_456 . . 1_455 ? 
O8 Ca1 Ca2 O3 -40.0(2) . . . 2_566 ? 
O7 Ca1 Ca2 O3 -130.9(2) . . . 2_566 ? 
O1 Ca1 Ca2 O3 174.2(2) 2_456 . . 2_566 ? 
O9 Ca1 Ca2 O3 52.5(2) . . . 2_566 ? 
O4 Ca1 Ca2 O3 -25.0(2) 2_566 . . 2_566 ? 
O2 Ca1 Ca2 O3 127.0(3) . . . 2_566 ? 
O1 Ca1 Ca2 O3 138.9(2) . . . 2_566 ? 
C12 Ca1 Ca2 O3 132.8(2) . . . 2_566 ? 
Ca1 Ca1 Ca2 O3 149.42(19) 2_456 . . 2_566 ? 
O8 Ca1 Ca2 O4 164.96(16) . . . 1_455 ? 
O7 Ca1 Ca2 O4 74.13(16) . . . 1_455 ? 
O1 Ca1 Ca2 O4 19.2(2) 2_456 . . 1_455 ? 
O9 Ca1 Ca2 O4 -102.51(17) . . . 1_455 ? 
O4 Ca1 Ca2 O4 180.000(2) 2_566 . . 1_455 ? 
O2 Ca1 Ca2 O4 -28.0(2) . . . 1_455 ? 
O1 Ca1 Ca2 O4 -16.11(16) . . . 1_455 ? 
C12 Ca1 Ca2 O4 -22.17(16) . . . 1_455 ? 
Ca1 Ca1 Ca2 O4 -5.58(14) 2_456 . . 1_455 ? 
O8 Ca1 Ca2 O4 -15.04(16) . . . 2_566 ? 
O7 Ca1 Ca2 O4 -105.87(16) . . . 2_566 ? 
O1 Ca1 Ca2 O4 -160.8(2) 2_456 . . 2_566 ? 
O9 Ca1 Ca2 O4 77.49(16) . . . 2_566 ? 
O2 Ca1 Ca2 O4 152.0(2) . . . 2_566 ? 
O1 Ca1 Ca2 O4 163.89(16) . . . 2_566 ? 
C12 Ca1 Ca2 O4 157.83(16) . . . 2_566 ? 
Ca1 Ca1 Ca2 O4 174.42(14) 2_456 . . 2_566 ? 
O8 Ca1 Ca2 C32 148.00(13) . . . 1_455 ? 
O7 Ca1 Ca2 C32 57.17(13) . . . 1_455 ? 
O1 Ca1 Ca2 C32 2.23(19) 2_456 . . 1_455 ? 
O9 Ca1 Ca2 C32 -119.47(13) . . . 1_455 ? 
O4 Ca1 Ca2 C32 163.04(17) 2_566 . . 1_455 ? 
O2 Ca1 Ca2 C32 -45.0(2) . . . 1_455 ? 
O1 Ca1 Ca2 C32 -33.07(12) . . . 1_455 ? 
C12 Ca1 Ca2 C32 -39.13(13) . . . 1_455 ? 
Ca1 Ca1 Ca2 C32 -22.54(10) 2_456 . . 1_455 ? 
O8 Ca1 Ca2 C32 -32.00(13) . . . 2_566 ? 
O7 Ca1 Ca2 C32 -122.83(13) . . . 2_566 ? 
O1 Ca1 Ca2 C32 -177.77(19) 2_456 . . 2_566 ? 
O9 Ca1 Ca2 C32 60.53(13) . . . 2_566 ? 
O4 Ca1 Ca2 C32 -16.96(17) 2_566 . . 2_566 ? 
O2 Ca1 Ca2 C32 135.0(2) . . . 2_566 ? 
O1 Ca1 Ca2 C32 146.93(12) . . . 2_566 ? 
C12 Ca1 Ca2 C32 140.87(13) . . . 2_566 ? 
Ca1 Ca1 Ca2 C32 157.46(10) 2_456 . . 2_566 ? 
O8 Ca1 Ca2 Ca1 -161(78) . . . 2_466 ? 
O7 Ca1 Ca2 Ca1 108(78) . . . 2_466 ? 
O1 Ca1 Ca2 Ca1 53(78) 2_456 . . 2_466 ? 
O9 Ca1 Ca2 Ca1 -69(78) . . . 2_466 ? 
O4 Ca1 Ca2 Ca1 -146(78) 2_566 . . 2_466 ? 
O2 Ca1 Ca2 Ca1 6(78) . . . 2_466 ? 
O1 Ca1 Ca2 Ca1 18(78) . . . 2_466 ? 
C12 Ca1 Ca2 Ca1 12(78) . . . 2_466 ? 
Ca1 Ca1 Ca2 Ca1 28(78) 2_456 . . 2_466 ? 
O8 Ca1 O1 C12 165.6(3) . . . . ? 
O7 Ca1 O1 C12 -84.6(2) . . . . ? 
O1 Ca1 O1 C12 -175.8(3) 2_456 . . . ? 
O9 Ca1 O1 C12 94.7(2) . . . . ? 
O4 Ca1 O1 C12 -0.2(3) 2_566 . . . ? 
O2 Ca1 O1 C12 -3.5(2) . . . . ? 
Ca1 Ca1 O1 C12 -175.8(3) 2_456 . . . ? 
Ca2 Ca1 O1 C12 -11.8(2) . . . . ? 
O8 Ca1 O1 Ca1 -18.7(3) . . . 2_456 ? 
O7 Ca1 O1 Ca1 91.13(12) . . . 2_456 ? 
O1 Ca1 O1 Ca1 0.0 2_456 . . 2_456 ? 
O9 Ca1 O1 Ca1 -89.54(12) . . . 2_456 ? 
O4 Ca1 O1 Ca1 175.58(11) 2_566 . . 2_456 ? 
O2 Ca1 O1 Ca1 172.31(19) . . . 2_456 ? 
C12 Ca1 O1 Ca1 175.8(3) . . . 2_456 ? 
Ca2 Ca1 O1 Ca1 163.94(10) . . . 2_456 ? 
O2 Ca2 O2 C12 70(26) 2_466 . . . ? 
O10 Ca2 O2 C12 75.4(7) . . . . ? 
O10 Ca2 O2 C12 -104.6(7) 2_466 . . . ? 
O3 Ca2 O2 C12 -28.6(7) 1_455 . . . ? 
O3 Ca2 O2 C12 151.4(7) 2_566 . . . ? 
O4 Ca2 O2 C12 8.1(7) 1_455 . . . ? 
O4 Ca2 O2 C12 -171.9(7) 2_566 . . . ? 
C32 Ca2 O2 C12 -11.7(7) 1_455 . . . ? 
C32 Ca2 O2 C12 168.3(7) 2_566 . . . ? 
Ca1 Ca2 O2 C12 -155.0(8) . . . . ? 
Ca1 Ca2 O2 C12 25.0(8) 2_466 . . . ? 
O2 Ca2 O2 Ca1 -135(26) 2_466 . . . ? 
O10 Ca2 O2 Ca1 -129.6(2) . . . . ? 
O10 Ca2 O2 Ca1 50.4(2) 2_466 . . . ? 
O3 Ca2 O2 Ca1 126.4(2) 1_455 . . . ? 
O3 Ca2 O2 Ca1 -53.6(2) 2_566 . . . ? 
O4 Ca2 O2 Ca1 163.09(14) 1_455 . . . ? 
O4 Ca2 O2 Ca1 -16.91(14) 2_566 . . . ? 
C32 Ca2 O2 Ca1 143.29(16) 1_455 . . . ? 
C32 Ca2 O2 Ca1 -36.71(16) 2_566 . . . ? 
Ca1 Ca2 O2 Ca1 180.0 2_466 . . . ? 
O8 Ca1 O2 C12 -168.7(2) . . . . ? 
O7 Ca1 O2 C12 97.9(3) . . . . ? 
O1 Ca1 O2 C12 12.5(3) 2_456 . . . ? 
O9 Ca1 O2 C12 -79.9(3) . . . . ? 
O4 Ca1 O2 C12 -173.5(3) 2_566 . . . ? 
O1 Ca1 O2 C12 3.5(2) . . . . ? 
Ca1 Ca1 O2 C12 8.0(3) 2_456 . . . ? 
Ca2 Ca1 O2 C12 168.4(4) . . . . ? 
O8 Ca1 O2 Ca2 22.9(4) . . . . ? 
O7 Ca1 O2 Ca2 -70.42(17) . . . . ? 
O1 Ca1 O2 Ca2 -155.90(13) 2_456 . . . ? 
O9 Ca1 O2 Ca2 111.76(17) . . . . ? 
O4 Ca1 O2 Ca2 18.13(15) 2_566 . . . ? 
O1 Ca1 O2 Ca2 -164.8(2) . . . . ? 
C12 Ca1 O2 Ca2 -168.4(4) . . . . ? 
Ca1 Ca1 O2 Ca2 -160.39(16) 2_456 . . . ? 
C6 C1 C2 C3 0.2(5) . . . . ? 
C11 C1 C2 C3 -178.7(3) . . . . ? 
C1 C2 C3 C4 -0.5(5) . . . . ? 
C1 C2 C3 C31 179.4(3) . . . . ? 
C2 C3 C4 C5 0.1(6) . . . . ? 
C31 C3 C4 C5 -179.8(3) . . . . ? 
C3 C4 C5 C6 0.7(5) . . . . ? 
C3 C4 C5 C51 -179.3(4) . . . . ? 
C2 C1 C6 C5 0.6(5) . . . . ? 
C11 C1 C6 C5 179.5(3) . . . . ? 
C4 C5 C6 C1 -1.1(5) . . . . ? 
C51 C5 C6 C1 178.9(3) . . . . ? 
C6 C1 C11 C12 -93.6(4) . . . . ? 
C2 C1 C11 C12 85.3(4) . . . . ? 
Ca2 O2 C12 O1 150.4(5) . . . . ? 
Ca1 O2 C12 O1 -6.4(4) . . . . ? 
Ca2 O2 C12 C11 -32.9(9) . . . . ? 
Ca1 O2 C12 C11 170.3(3) . . . . ? 
Ca2 O2 C12 Ca1 156.8(8) . . . . ? 
Ca1 O1 C12 O2 -161.9(6) 2_456 . . . ? 
Ca1 O1 C12 O2 6.3(4) . . . . ? 
Ca1 O1 C12 C11 21.4(10) 2_456 . . . ? 
Ca1 O1 C12 C11 -170.4(3) . . . . ? 
Ca1 O1 C12 Ca1 -168.2(8) 2_456 . . . ? 
C1 C11 C12 O2 -100.9(4) . . . . ? 
C1 C11 C12 O1 75.8(5) . . . . ? 
C1 C11 C12 Ca1 -19(2) . . . . ? 
O8 Ca1 C12 O2 50.8(10) . . . . ? 
O7 Ca1 C12 O2 -79.5(3) . . . . ? 
O1 Ca1 C12 O2 -169.6(3) 2_456 . . . ? 
O9 Ca1 C12 O2 101.3(3) . . . . ? 
O4 Ca1 C12 O2 6.1(3) 2_566 . . . ? 
O1 Ca1 C12 O2 -173.7(4) . . . . ? 
Ca1 Ca1 C12 O2 -170.9(3) 2_456 . . . ? 
Ca2 Ca1 C12 O2 -7.5(3) . . . . ? 
O8 Ca1 C12 O1 -135.4(8) . . . . ? 
O7 Ca1 C12 O1 94.2(2) . . . . ? 
O1 Ca1 C12 O1 4.1(3) 2_456 . . . ? 
O9 Ca1 C12 O1 -84.9(2) . . . . ? 
O4 Ca1 C12 O1 179.8(2) 2_566 . . . ? 
O2 Ca1 C12 O1 173.7(4) . . . . ? 
Ca1 Ca1 C12 O1 2.78(19) 2_456 . . . ? 
Ca2 Ca1 C12 O1 166.2(2) . . . . ? 
O8 Ca1 C12 C11 -36(2) . . . . ? 
O7 Ca1 C12 C11 -166.7(18) . . . . ? 
O1 Ca1 C12 C11 103.1(18) 2_456 . . . ? 
O9 Ca1 C12 C11 14.1(18) . . . . ? 
O4 Ca1 C12 C11 -81.1(18) 2_566 . . . ? 
O2 Ca1 C12 C11 -87.2(18) . . . . ? 
O1 Ca1 C12 C11 99.0(18) . . . . ? 
Ca1 Ca1 C12 C11 101.8(18) 2_456 . . . ? 
Ca2 Ca1 C12 C11 -94.7(18) . . . . ? 
C2 C3 C31 C32 -103.1(4) . . . . ? 
C4 C3 C31 C32 76.9(5) . . . . ? 
Ca2 O3 C32 O4 -3.5(6) 1_655 . . . ? 
Ca2 O3 C32 C31 -179.6(3) 1_655 . . . ? 
Ca1 O4 C32 O3 122.1(6) 2_566 . . . ? 
Ca2 O4 C32 O3 3.2(6) 1_655 . . . ? 
Ca1 O4 C32 C31 -61.8(6) 2_566 . . . ? 
Ca2 O4 C32 C31 179.3(4) 1_655 . . . ? 
Ca1 O4 C32 Ca2 118.9(4) 2_566 . . 1_655 ? 
C3 C31 C32 O3 -7.7(7) . . . . ? 
C3 C31 C32 O4 176.2(4) . . . . ? 
C3 C31 C32 Ca2 -13(5) . . . 1_655 ? 
C4 C5 C51 C52 -75.0(5) . . . . ? 
C6 C5 C51 C52 105.0(4) . . . . ? 
C5 C51 C52 O6 148.7(6) . . . . ? 
C5 C51 C52 O5 -31.8(6) . . . . ? 
 
_diffrn_measured_fraction_theta_max    0.947 
_diffrn_reflns_theta_full              27.48 
_diffrn_measured_fraction_theta_full   0.947 
_refine_diff_density_max    0.860 
_refine_diff_density_min   -0.665 
_refine_diff_density_rms    0.168 

#====END
 
data_2
_audit_creation_date             
_audit_creation_method            SHELXL-97 

_publ_section_references
;
    ENTER OTHER REFERENCES
Molecular Structure Corporation, Rigaku Corporation. (2000). teXsan. 
Single Crystal Structure Analysis Software. Version 1.11.
MSC, 3200 Research Forest Drive, The Woodlands, TX 77381, USA.
Rigaku, 3-9-12 Akishima, Tokyo, Japan.
;

_chemical_name_systematic 
; 
[Ba3(bta)2(H2O)8]
; 
_chemical_name_common             ? 
_chemical_melting_point           ? 
_chemical_formula_moiety          'C24 H34 Ba3 O20 '
_chemical_formula_sum 
 'C24 H34 Ba3 O20' 
_chemical_formula_weight          1054.53 
 
loop_ 
 _atom_type_symbol 
 _atom_type_description 
 _atom_type_scat_dispersion_real 
 _atom_type_scat_dispersion_imag 
 _atom_type_scat_source 
 'C'  'C'   0.0033   0.0016 
 'International Tables Vol C Tables 4.2.6.8 and 6.1.1.4' 
 'H'  'H'   0.0000   0.0000 
 'International Tables Vol C Tables 4.2.6.8 and 6.1.1.4' 
 'O'  'O'   0.0106   0.0060 
 'International Tables Vol C Tables 4.2.6.8 and 6.1.1.4' 
 'Ba'  'Ba'  -0.3244   2.2819 
 'International Tables Vol C Tables 4.2.6.8 and 6.1.1.4' 
 
_symmetry_cell_setting            monoclinic
_symmetry_space_group_name_H-M    'C 1 2/c 1'
_symmetry_Int_Tables_number            15
loop_ 
 _symmetry_equiv_pos_as_xyz 
 'x, y, z' 
 '-x, y, -z+1/2' 
 'x+1/2, y+1/2, z' 
 '-x+1/2, y+1/2, -z+1/2' 
 '-x, -y, -z' 
 'x, -y, z-1/2' 
 '-x+1/2, -y+1/2, -z' 
 'x+1/2, -y+1/2, z-1/2' 
 
_cell_length_a                    23.4363(8) 
_cell_length_b                    6.9782(3) 
_cell_length_c                    21.7150(8) 
_cell_angle_alpha                 90.00 
_cell_angle_beta                  111.4480(10) 
_cell_angle_gamma                 90.00 
_cell_volume                      3305.4(2) 
_cell_formula_units_Z             4 
_cell_measurement_temperature     200
_cell_measurement_reflns_used     12751
_cell_measurement_theta_min       1.8
_cell_measurement_theta_max       27.5
 
_exptl_crystal_description        'needle'
_exptl_crystal_colour             'colorless'
_exptl_crystal_size_max           0.150
_exptl_crystal_size_mid           0.150
_exptl_crystal_size_min           0.020
_exptl_crystal_density_meas       ? 
_exptl_crystal_density_diffrn     2.119 
_exptl_crystal_density_method     'not measured' 
_exptl_crystal_F_000              2024 
_exptl_absorpt_coefficient_mu     3.618 
_exptl_absorpt_correction_type    multi-scan
_exptl_absorpt_correction_T_min   0.779
_exptl_absorpt_correction_T_max   0.930
_exptl_absorpt_process_details    '(Higashi, 1995)'
 
_exptl_special_details 
; 
 ? 
; 
 
_diffrn_ambient_temperature       200
_diffrn_radiation_wavelength      0.71069 
_diffrn_radiation_type            MoK\a 
_diffrn_radiation_source          'fine-focus sealed tube' 
_diffrn_radiation_monochromator   graphite 
_diffrn_measurement_device_type   'Rigaku RAXIS-RAPID Imaging Plate'
_diffrn_measurement_method        \w
_diffrn_detector_area_resol_mean  10.00
_diffrn_standards_number          ? 
_diffrn_standards_interval_count  ? 
_diffrn_standards_interval_time   ? 
_diffrn_standards_decay_%         ? 
_diffrn_reflns_number             6853 
_diffrn_reflns_av_R_equivalents   0.0251 
_diffrn_reflns_av_sigmaI/netI     0.0425 
_diffrn_reflns_limit_h_min        -29 
_diffrn_reflns_limit_h_max        30 
_diffrn_reflns_limit_k_min        -9 
_diffrn_reflns_limit_k_max        9 
_diffrn_reflns_limit_l_min        -28 
_diffrn_reflns_limit_l_max        28 
_diffrn_reflns_theta_min          2.19 
_diffrn_reflns_theta_max          27.48 
_reflns_number_total              3778 
_reflns_number_gt                 3017 
_reflns_threshold_expression      >2sigma(I) 
 
_computing_data_collection        ? 
_computing_cell_refinement        ? 
_computing_data_reduction         ? 
_computing_structure_solution     'SHELXS-97 (Sheldrick, 1990)' 
_computing_structure_refinement   'SHELXL-97 (Sheldrick, 1997)' 
_computing_molecular_graphics     ? 
_computing_publication_material   ? 
 
_refine_special_details 
; 
 Refinement of F^2^ against ALL reflections.  The weighted R-factor wR and 
 goodness of fit S are based on F^2^, conventional R-factors R are based 
 on F, with F set to zero for negative F^2^. The threshold expression of 
 F^2^ > 2sigma(F^2^) is used only for calculating R-factors(gt) etc. and is 
 not relevant to the choice of reflections for refinement.  R-factors based 
 on F^2^ are statistically about twice as large as those based on F, and R- 
 factors based on ALL data will be even larger. 
; 
 
_refine_ls_structure_factor_coef  Fsqd  
_refine_ls_matrix_type            full 
_refine_ls_weighting_scheme       calc  
_refine_ls_weighting_details 
 'calc w=1/[\s^2^(Fo^2^)+(0.0186P)^2^+0.0000P] where P=(Fo^2^+2Fc^2^)/3' 
_atom_sites_solution_primary      direct 
_atom_sites_solution_secondary    difmap 
_atom_sites_solution_hydrogens    geom 
_refine_ls_hydrogen_treatment     mixed 
_refine_ls_extinction_method      none 
_refine_ls_extinction_coef        ? 
_refine_ls_number_reflns          3778 
_refine_ls_number_parameters      227 
_refine_ls_number_restraints      0 
_refine_ls_R_factor_all           0.0368 
_refine_ls_R_factor_gt            0.0228 
_refine_ls_wR_factor_ref          0.0431 
_refine_ls_wR_factor_gt           0.0411 
_refine_ls_goodness_of_fit_ref    0.927 
_refine_ls_restrained_S_all       0.927 
_refine_ls_shift/su_max           0.001 
_refine_ls_shift/su_mean          0.000 
 
loop_ 
 _atom_site_label 
 _atom_site_type_symbol 
 _atom_site_fract_x 
 _atom_site_fract_y 
 _atom_site_fract_z 
 _atom_site_U_iso_or_equiv 
 _atom_site_adp_type 
 _atom_site_occupancy 
 _atom_site_symmetry_multiplicity 
 _atom_site_calc_flag 
 _atom_site_refinement_flags 
 _atom_site_disorder_assembly 
 _atom_site_disorder_group 
Ba1 Ba 0.0000 0.75529(4) 0.2500 0.01664(6) Uani 1 2 d S . . 
Ba2 Ba 0.061424(8) 0.98849(3) 0.445964(8) 0.01681(5) Uani 1 1 d . . . 
O1 O 0.04254(11) 1.0980(3) 0.31997(11) 0.0240(5) Uani 1 1 d . . . 
O2 O 0.05134(11) 1.4136(3) 0.31792(12) 0.0246(5) Uani 1 1 d . . . 
O3 O 0.05836(10) 1.9152(4) 0.06347(11) 0.0293(6) Uani 1 1 d . . . 
O4 O 0.04076(10) 1.8119(3) 0.15099(10) 0.0238(5) Uani 1 1 d . . . 
O5 O 0.21383(10) 1.9380(4) 0.41089(13) 0.0368(6) Uani 1 1 d . . . 
O6 O 0.31394(10) 1.9852(4) 0.45659(13) 0.0369(6) Uani 1 1 d . . . 
O7 O 0.10764(11) 0.7436(4) 0.37459(12) 0.0300(5) Uani 1 1 d . . . 
H10 H 0.1419(17) 0.775(6) 0.3838(18) 0.036 Uiso 1 1 d . . . 
H11 H 0.1116(17) 0.616(6) 0.3734(19) 0.036 Uiso 1 1 d . . . 
O8 O 0.16765(12) 1.1775(4) 0.47867(15) 0.0523(8) Uani 1 1 d . . . 
H12 H 0.1917 1.1159 0.4654 0.063 Uiso 1 1 calc R . . 
H13 H 0.1847 1.2698 0.5014 0.063 Uiso 1 1 d R . . 
O9 O 0.00967(10) 1.3583(3) 0.42195(12) 0.0269(5) Uani 1 1 d . . . 
H14 H 0.0329 1.4355 0.4495 0.032 Uiso 1 1 calc R . . 
H15 H 0.0126 1.3935 0.3938 0.032 Uiso 1 1 d R . . 
O10 O 0.07307(12) 0.6392(4) 0.51117(12) 0.0268(5) Uani 1 1 d . . . 
H16 H 0.0614(17) 0.640(5) 0.5435(19) 0.032 Uiso 1 1 d . . . 
H17 H 0.1092(18) 0.599(5) 0.5280(18) 0.032 Uiso 1 1 d . . . 
C1 C 0.15087(14) 1.3991(4) 0.27600(15) 0.0185(6) Uani 1 1 d . . . 
C2 C 0.19921(13) 1.4655(4) 0.33173(14) 0.0186(7) Uani 1 1 d . . . 
H1 H 0.2119 1.3927 0.3714 0.022 Uiso 1 1 calc R . . 
C3 C 0.22882(13) 1.6357(4) 0.32981(15) 0.0186(6) Uani 1 1 d . . . 
C4 C 0.20959(13) 1.7405(5) 0.27089(14) 0.0208(6) Uani 1 1 d . . . 
H2 H 0.2294 1.8582 0.2693 0.025 Uiso 1 1 calc R . . 
C5 C 0.16243(13) 1.6772(5) 0.21471(15) 0.0206(7) Uani 1 1 d . . . 
C6 C 0.13356(13) 1.5055(5) 0.21822(14) 0.0198(6) Uani 1 1 d . . . 
H3 H 0.1012 1.4602 0.1801 0.024 Uiso 1 1 calc R . . 
C11 C 0.11666(14) 1.2190(5) 0.27954(16) 0.0246(7) Uani 1 1 d . . . 
H4 H 0.1464 1.1236 0.3070 0.030 Uiso 1 1 calc R . . 
H5 H 0.0978 1.1651 0.2344 0.030 Uiso 1 1 calc R . . 
C12 C 0.06641(13) 1.2476(5) 0.30828(14) 0.0208(6) Uani 1 1 d . . . 
C31 C 0.28098(14) 1.7086(5) 0.38961(16) 0.0267(7) Uani 1 1 d . . . 
H6 H 0.3166 1.7330 0.3766 0.032 Uiso 1 1 calc R . . 
H7 H 0.2929 1.6061 0.4235 0.032 Uiso 1 1 calc R . . 
C32 C 0.26796(15) 1.8907(5) 0.42134(16) 0.0239(7) Uani 1 1 d . . . 
C51 C 0.14346(14) 1.7882(5) 0.15150(16) 0.0269(8) Uani 1 1 d . . . 
H8 H 0.1546 1.7128 0.1189 0.032 Uiso 1 1 calc R . . 
H9 H 0.1676 1.9083 0.1598 0.032 Uiso 1 1 calc R . . 
C52 C 0.07605(14) 1.8400(4) 0.12038(15) 0.0188(6) Uani 1 1 d . . . 
 
loop_ 
 _atom_site_aniso_label 
 _atom_site_aniso_U_11 
 _atom_site_aniso_U_22 
 _atom_site_aniso_U_33 
 _atom_site_aniso_U_23 
 _atom_site_aniso_U_13 
 _atom_site_aniso_U_12 
Ba1 0.02361(13) 0.01466(13) 0.01404(12) 0.000 0.00970(10) 0.000 
Ba2 0.01854(8) 0.01891(10) 0.01375(8) -0.00267(8) 0.00680(6) -0.00248(8) 
O1 0.0331(13) 0.0201(12) 0.0183(12) 0.0002(9) 0.0090(10) -0.0081(10) 
O2 0.0294(13) 0.0180(12) 0.0299(13) 0.0015(10) 0.0151(11) 0.0005(10) 
O3 0.0263(13) 0.0437(15) 0.0195(12) 0.0141(11) 0.0104(10) 0.0089(11) 
O4 0.0224(11) 0.0329(13) 0.0211(11) 0.0082(10) 0.0138(9) 0.0083(10) 
O5 0.0208(13) 0.0358(14) 0.0501(16) -0.0196(12) 0.0086(11) 0.0034(10) 
O6 0.0232(12) 0.0354(15) 0.0478(15) -0.0218(14) 0.0077(11) -0.0038(12) 
O7 0.0231(12) 0.0248(13) 0.0436(14) -0.0091(13) 0.0138(11) -0.0004(12) 
O8 0.0366(15) 0.0488(18) 0.085(2) -0.0419(17) 0.0381(16) -0.0231(14) 
O9 0.0343(13) 0.0255(13) 0.0243(12) -0.0008(10) 0.0149(11) -0.0016(10) 
O10 0.0239(13) 0.0305(14) 0.0266(13) 0.0008(11) 0.0098(11) 0.0011(11) 
C1 0.0200(16) 0.0147(15) 0.0228(16) -0.0026(13) 0.0103(13) 0.0006(12) 
C2 0.0187(15) 0.0221(18) 0.0153(14) 0.0034(13) 0.0066(12) 0.0048(13) 
C3 0.0133(14) 0.0222(17) 0.0198(15) -0.0022(13) 0.0054(12) 0.0042(12) 
C4 0.0171(14) 0.0185(16) 0.0274(16) 0.0012(14) 0.0086(12) 0.0006(13) 
C5 0.0144(15) 0.0267(17) 0.0217(16) 0.0049(14) 0.0079(13) 0.0025(13) 
C6 0.0177(14) 0.0233(16) 0.0161(14) -0.0022(15) 0.0033(11) -0.0003(14) 
C11 0.0259(16) 0.0188(17) 0.0297(17) -0.0007(14) 0.0107(14) -0.0002(14) 
C12 0.0234(15) 0.0219(16) 0.0124(13) 0.0006(14) 0.0010(12) -0.0047(14) 
C31 0.0195(16) 0.0267(19) 0.0279(17) -0.0093(15) 0.0015(13) 0.0045(14) 
C32 0.0238(17) 0.0223(17) 0.0241(17) -0.0031(14) 0.0070(14) -0.0007(14) 
C51 0.0186(16) 0.036(2) 0.0268(17) 0.0107(16) 0.0090(13) -0.0008(14) 
C52 0.0219(16) 0.0183(16) 0.0165(15) -0.0001(13) 0.0075(13) 0.0003(13) 
 
_geom_special_details 
; 
 All esds (except the esd in the dihedral angle between two l.s. planes) 
 are estimated using the full covariance matrix.  The cell esds are taken 
 into account individually in the estimation of esds in distances, angles 
 and torsion angles; correlations between esds in cell parameters are only 
 used when they are defined by crystal symmetry.  An approximate (isotropic) 
 treatment of cell esds is used for estimating esds involving l.s. planes. 
; 
 
loop_ 
 _geom_bond_atom_site_label_1 
 _geom_bond_atom_site_label_2 
 _geom_bond_distance 
 _geom_bond_site_symmetry_2 
 _geom_bond_publ_flag 
Ba1 O4 2.6820(19) 2_545 ? 
Ba1 O4 2.6820(19) 1_545 ? 
Ba1 O1 2.813(2) . ? 
Ba1 O1 2.813(2) 2 ? 
Ba1 O2 2.830(2) 2_545 ? 
Ba1 O2 2.830(2) 1_545 ? 
Ba1 O7 2.949(2) 2 ? 
Ba1 O7 2.949(2) . ? 
Ba1 Ba2 4.2835(2) 2 ? 
Ba1 Ba2 4.2835(3) . ? 
Ba2 O3 2.665(2) 6_586 ? 
Ba2 O8 2.674(2) . ? 
Ba2 O1 2.717(2) . ? 
Ba2 O7 2.779(2) . ? 
Ba2 O10 2.782(3) . ? 
Ba2 O3 2.786(2) 2_545 ? 
Ba2 O9 2.818(2) . ? 
Ba2 O4 2.828(2) 2_545 ? 
Ba2 C52 3.184(3) 2_545 ? 
Ba2 Ba2 4.3317(4) 5_576 ? 
O1 C12 1.253(4) . ? 
O2 C12 1.251(4) . ? 
O2 Ba1 2.830(2) 1_565 ? 
O3 C52 1.265(3) . ? 
O3 Ba2 2.665(2) 6_585 ? 
O3 Ba2 2.787(2) 2_565 ? 
O4 C52 1.252(3) . ? 
O4 Ba1 2.6820(19) 1_565 ? 
O4 Ba2 2.828(2) 2_565 ? 
O5 C32 1.249(4) . ? 
O6 C32 1.256(4) . ? 
O7 H10 0.78(4) . ? 
O7 H11 0.89(4) . ? 
O8 H12 0.8400 . ? 
O8 H13 0.8217 . ? 
O9 H14 0.8400 . ? 
O9 H15 0.6854 . ? 
O10 H16 0.84(4) . ? 
O10 H17 0.84(4) . ? 
C1 C6 1.385(4) . ? 
C1 C2 1.400(4) . ? 
C1 C11 1.508(4) . ? 
C2 C3 1.383(4) . ? 
C2 H1 0.9500 . ? 
C3 C4 1.398(4) . ? 
C3 C31 1.510(4) . ? 
C4 C5 1.385(4) . ? 
C4 H2 0.9500 . ? 
C5 C6 1.392(4) . ? 
C5 C51 1.495(4) . ? 
C6 H3 0.9500 . ? 
C11 C12 1.534(4) . ? 
C11 H4 0.9900 . ? 
C11 H5 0.9900 . ? 
C31 C32 1.529(4) . ? 
C31 H6 0.9900 . ? 
C31 H7 0.9900 . ? 
C51 C52 1.517(4) . ? 
C51 H8 0.9900 . ? 
C51 H9 0.9900 . ? 
C52 Ba2 3.184(3) 2_565 ? 
 
loop_ 
 _geom_angle_atom_site_label_1 
 _geom_angle_atom_site_label_2 
 _geom_angle_atom_site_label_3 
 _geom_angle 
 _geom_angle_site_symmetry_1 
 _geom_angle_site_symmetry_3 
 _geom_angle_publ_flag 
O4 Ba1 O4 163.06(10) 2_545 1_545 ? 
O4 Ba1 O1 66.52(6) 2_545 . ? 
O4 Ba1 O1 98.51(7) 1_545 . ? 
O4 Ba1 O1 98.51(7) 2_545 2 ? 
O4 Ba1 O1 66.52(6) 1_545 2 ? 
O1 Ba1 O1 63.55(9) . 2 ? 
O4 Ba1 O2 109.50(6) 2_545 2_545 ? 
O4 Ba1 O2 85.09(7) 1_545 2_545 ? 
O1 Ba1 O2 175.42(7) . 2_545 ? 
O1 Ba1 O2 115.82(6) 2 2_545 ? 
O4 Ba1 O2 85.09(7) 2_545 1_545 ? 
O4 Ba1 O2 109.50(6) 1_545 1_545 ? 
O1 Ba1 O2 115.82(6) . 1_545 ? 
O1 Ba1 O2 175.42(7) 2 1_545 ? 
O2 Ba1 O2 65.21(10) 2_545 1_545 ? 
O4 Ba1 O7 107.67(7) 2_545 2 ? 
O4 Ba1 O7 72.82(6) 1_545 2 ? 
O1 Ba1 O7 122.29(7) . 2 ? 
O1 Ba1 O7 60.84(7) 2 2 ? 
O2 Ba1 O7 55.99(7) 2_545 2 ? 
O2 Ba1 O7 120.85(7) 1_545 2 ? 
O4 Ba1 O7 72.82(6) 2_545 . ? 
O4 Ba1 O7 107.67(7) 1_545 . ? 
O1 Ba1 O7 60.84(7) . . ? 
O1 Ba1 O7 122.29(7) 2 . ? 
O2 Ba1 O7 120.85(7) 2_545 . ? 
O2 Ba1 O7 55.99(7) 1_545 . ? 
O7 Ba1 O7 176.83(11) 2 . ? 
O4 Ba1 Ba2 130.66(5) 2_545 2 ? 
O4 Ba1 Ba2 40.22(4) 1_545 2 ? 
O1 Ba1 Ba2 97.91(5) . 2 ? 
O1 Ba1 Ba2 38.42(4) 2 2 ? 
O2 Ba1 Ba2 82.99(5) 2_545 2 ? 
O2 Ba1 Ba2 139.66(5) 1_545 2 ? 
O7 Ba1 Ba2 40.11(5) 2 2 ? 
O7 Ba1 Ba2 141.80(5) . 2 ? 
O4 Ba1 Ba2 40.22(5) 2_545 . ? 
O4 Ba1 Ba2 130.66(5) 1_545 . ? 
O1 Ba1 Ba2 38.42(4) . . ? 
O1 Ba1 Ba2 97.90(5) 2 . ? 
O2 Ba1 Ba2 139.66(5) 2_545 . ? 
O2 Ba1 Ba2 82.99(5) 1_545 . ? 
O7 Ba1 Ba2 141.79(5) 2 . ? 
O7 Ba1 Ba2 40.11(5) . . ? 
Ba2 Ba1 Ba2 135.345(9) 2 . ? 
O3 Ba2 O8 88.26(8) 6_586 . ? 
O3 Ba2 O1 147.33(7) 6_586 . ? 
O8 Ba2 O1 85.51(8) . . ? 
O3 Ba2 O7 147.30(8) 6_586 . ? 
O8 Ba2 O7 86.36(7) . . ? 
O1 Ba2 O7 64.19(7) . . ? 
O3 Ba2 O10 76.45(8) 6_586 . ? 
O8 Ba2 O10 112.86(9) . . ? 
O1 Ba2 O10 135.13(7) . . ? 
O7 Ba2 O10 76.07(8) . . ? 
O3 Ba2 O3 74.79(7) 6_586 2_545 ? 
O8 Ba2 O3 157.71(7) . 2_545 ? 
O1 Ba2 O3 100.89(7) . 2_545 ? 
O7 Ba2 O3 115.71(7) . 2_545 ? 
O10 Ba2 O3 77.60(8) . 2_545 ? 
O3 Ba2 O9 77.62(7) 6_586 . ? 
O8 Ba2 O9 83.88(8) . . ? 
O1 Ba2 O9 69.84(7) . . ? 
O7 Ba2 O9 133.56(7) . . ? 
O10 Ba2 O9 148.45(7) . . ? 
O3 Ba2 O9 78.49(7) 2_545 . ? 
O3 Ba2 O4 120.71(6) 6_586 2_545 ? 
O8 Ba2 O4 149.93(7) . 2_545 ? 
O1 Ba2 O4 65.87(6) . 2_545 ? 
O7 Ba2 O4 73.35(7) . 2_545 ? 
O10 Ba2 O4 84.03(7) . 2_545 ? 
O3 Ba2 O4 46.31(6) 2_545 2_545 ? 
O9 Ba2 O4 94.09(7) . 2_545 ? 
O3 Ba2 C52 97.95(7) 6_586 2_545 ? 
O8 Ba2 C52 166.10(9) . 2_545 ? 
O1 Ba2 C52 82.57(7) . 2_545 ? 
O7 Ba2 C52 94.81(7) . 2_545 ? 
O10 Ba2 C52 80.78(7) . 2_545 ? 
O3 Ba2 C52 23.26(6) 2_545 2_545 ? 
O9 Ba2 C52 85.32(7) . 2_545 ? 
O4 Ba2 C52 23.07(7) 2_545 2_545 ? 
O3 Ba2 Ba1 158.45(5) 6_586 . ? 
O8 Ba2 Ba1 113.16(6) . . ? 
O1 Ba2 Ba1 40.06(5) . . ? 
O7 Ba2 Ba1 43.14(5) . . ? 
O10 Ba2 Ba1 96.17(5) . . ? 
O3 Ba2 Ba1 83.90(4) 2_545 . ? 
O9 Ba2 Ba1 101.45(5) . . ? 
O4 Ba2 Ba1 37.76(4) 2_545 . ? 
C52 Ba2 Ba1 60.66(5) 2_545 . ? 
O3 Ba2 Ba2 38.37(5) 6_586 5_576 ? 
O8 Ba2 Ba2 125.21(6) . 5_576 ? 
O1 Ba2 Ba2 129.75(5) . 5_576 ? 
O7 Ba2 Ba2 142.82(6) . 5_576 ? 
O10 Ba2 Ba2 73.60(5) . 5_576 ? 
O3 Ba2 Ba2 36.42(4) 2_545 5_576 ? 
O9 Ba2 Ba2 74.92(4) . 5_576 ? 
O4 Ba2 Ba2 82.52(4) 2_545 5_576 ? 
C52 Ba2 Ba2 59.61(5) 2_545 5_576 ? 
Ba1 Ba2 Ba2 120.252(7) . 5_576 ? 
C12 O1 Ba2 121.20(19) . . ? 
C12 O1 Ba1 134.01(19) . . ? 
Ba2 O1 Ba1 101.52(7) . . ? 
C12 O2 Ba1 141.7(2) . 1_565 ? 
C52 O3 Ba2 157.86(19) . 6_585 ? 
C52 O3 Ba2 96.28(17) . 2_565 ? 
Ba2 O3 Ba2 105.22(7) 6_585 2_565 ? 
C52 O4 Ba1 161.3(2) . 1_565 ? 
C52 O4 Ba2 94.62(18) . 2_565 ? 
Ba1 O4 Ba2 102.01(6) 1_565 2_565 ? 
Ba2 O7 Ba1 96.75(7) . . ? 
Ba2 O7 H10 105(3) . . ? 
Ba1 O7 H10 133(3) . . ? 
Ba2 O7 H11 134(2) . . ? 
Ba1 O7 H11 94(2) . . ? 
H10 O7 H11 100(4) . . ? 
Ba2 O8 H12 109.5 . . ? 
Ba2 O8 H13 138.4 . . ? 
H12 O8 H13 111.6 . . ? 
Ba2 O9 H14 109.5 . . ? 
Ba2 O9 H15 108.4 . . ? 
H14 O9 H15 98.9 . . ? 
Ba2 O10 H16 114(3) . . ? 
Ba2 O10 H17 114(3) . . ? 
H16 O10 H17 103(3) . . ? 
C6 C1 C2 118.8(3) . . ? 
C6 C1 C11 120.5(3) . . ? 
C2 C1 C11 120.6(3) . . ? 
C3 C2 C1 121.0(3) . . ? 
C3 C2 H1 119.5 . . ? 
C1 C2 H1 119.5 . . ? 
C2 C3 C4 118.6(3) . . ? 
C2 C3 C31 121.4(3) . . ? 
C4 C3 C31 120.0(3) . . ? 
C5 C4 C3 121.7(3) . . ? 
C5 C4 H2 119.1 . . ? 
C3 C4 H2 119.1 . . ? 
C4 C5 C6 118.3(3) . . ? 
C4 C5 C51 121.1(3) . . ? 
C6 C5 C51 120.6(3) . . ? 
C1 C6 C5 121.6(3) . . ? 
C1 C6 H3 119.2 . . ? 
C5 C6 H3 119.2 . . ? 
C1 C11 C12 114.4(3) . . ? 
C1 C11 H4 108.7 . . ? 
C12 C11 H4 108.7 . . ? 
C1 C11 H5 108.7 . . ? 
C12 C11 H5 108.7 . . ? 
H4 C11 H5 107.6 . . ? 
O2 C12 O1 124.3(3) . . ? 
O2 C12 C11 119.6(3) . . ? 
O1 C12 C11 116.1(3) . . ? 
C3 C31 C32 115.8(3) . . ? 
C3 C31 H6 108.3 . . ? 
C32 C31 H6 108.3 . . ? 
C3 C31 H7 108.3 . . ? 
C32 C31 H7 108.3 . . ? 
H6 C31 H7 107.4 . . ? 
O5 C32 O6 124.1(3) . . ? 
O5 C32 C31 119.7(3) . . ? 
O6 C32 C31 116.3(3) . . ? 
C5 C51 C52 116.4(2) . . ? 
C5 C51 H8 108.2 . . ? 
C52 C51 H8 108.2 . . ? 
C5 C51 H9 108.2 . . ? 
C52 C51 H9 108.2 . . ? 
H8 C51 H9 107.4 . . ? 
O4 C52 O3 122.7(3) . . ? 
O4 C52 C51 120.6(3) . . ? 
O3 C52 C51 116.7(3) . . ? 
O4 C52 Ba2 62.31(16) . 2_565 ? 
O3 C52 Ba2 60.46(15) . 2_565 ? 
C51 C52 Ba2 174.7(2) . 2_565 ? 
 
loop_ 
 _geom_torsion_atom_site_label_1 
 _geom_torsion_atom_site_label_2 
 _geom_torsion_atom_site_label_3 
 _geom_torsion_atom_site_label_4 
 _geom_torsion 
 _geom_torsion_site_symmetry_1 
 _geom_torsion_site_symmetry_2 
 _geom_torsion_site_symmetry_3 
 _geom_torsion_site_symmetry_4 
 _geom_torsion_publ_flag 
O4 Ba1 Ba2 O3 3.48(17) 2_545 . . 6_586 ? 
O4 Ba1 Ba2 O3 163.07(17) 1_545 . . 6_586 ? 
O1 Ba1 Ba2 O3 123.34(17) . . . 6_586 ? 
O1 Ba1 Ba2 O3 97.33(16) 2 . . 6_586 ? 
O2 Ba1 Ba2 O3 -50.10(17) 2_545 . . 6_586 ? 
O2 Ba1 Ba2 O3 -87.20(16) 1_545 . . 6_586 ? 
O7 Ba1 Ba2 O3 45.57(17) 2 . . 6_586 ? 
O7 Ba1 Ba2 O3 -130.42(17) . . . 6_586 ? 
Ba2 Ba1 Ba2 O3 107.31(15) 2 . . 6_586 ? 
O4 Ba1 Ba2 O8 -169.98(10) 2_545 . . . ? 
O4 Ba1 Ba2 O8 -10.40(9) 1_545 . . . ? 
O1 Ba1 Ba2 O8 -50.12(11) . . . . ? 
O1 Ba1 Ba2 O8 -76.13(9) 2 . . . ? 
O2 Ba1 Ba2 O8 136.44(10) 2_545 . . . ? 
O2 Ba1 Ba2 O8 99.34(9) 1_545 . . . ? 
O7 Ba1 Ba2 O8 -127.89(11) 2 . . . ? 
O7 Ba1 Ba2 O8 56.12(11) . . . . ? 
Ba2 Ba1 Ba2 O8 -66.15(7) 2 . . . ? 
O4 Ba1 Ba2 O1 -119.86(11) 2_545 . . . ? 
O4 Ba1 Ba2 O1 39.73(10) 1_545 . . . ? 
O1 Ba1 Ba2 O1 -26.01(13) 2 . . . ? 
O2 Ba1 Ba2 O1 -173.44(11) 2_545 . . . ? 
O2 Ba1 Ba2 O1 149.46(8) 1_545 . . . ? 
O7 Ba1 Ba2 O1 -77.77(11) 2 . . . ? 
O7 Ba1 Ba2 O1 106.24(11) . . . . ? 
Ba2 Ba1 Ba2 O1 -16.03(8) 2 . . . ? 
O4 Ba1 Ba2 O7 133.90(11) 2_545 . . . ? 
O4 Ba1 Ba2 O7 -66.51(10) 1_545 . . . ? 
O1 Ba1 Ba2 O7 -106.24(11) . . . . ? 
O1 Ba1 Ba2 O7 -132.25(9) 2 . . . ? 
O2 Ba1 Ba2 O7 80.32(11) 2_545 . . . ? 
O2 Ba1 Ba2 O7 43.22(9) 1_545 . . . ? 
O7 Ba1 Ba2 O7 175.99(13) 2 . . . ? 
Ba2 Ba1 Ba2 O7 -122.27(8) 2 . . . ? 
O4 Ba1 Ba2 O10 71.91(9) 2_545 . . . ? 
O4 Ba1 Ba2 O10 -128.51(8) 1_545 . . . ? 
O1 Ba1 Ba2 O10 -168.24(10) . . . . ? 
O1 Ba1 Ba2 O10 165.75(7) 2 . . . ? 
O2 Ba1 Ba2 O10 18.33(9) 2_545 . . . ? 
O2 Ba1 Ba2 O10 -18.78(7) 1_545 . . . ? 
O7 Ba1 Ba2 O10 113.99(9) 2 . . . ? 
O7 Ba1 Ba2 O10 -62.00(10) . . . . ? 
Ba2 Ba1 Ba2 O10 175.73(5) 2 . . . ? 
O4 Ba1 Ba2 O3 -4.87(10) 2_545 . . 2_545 ? 
O4 Ba1 Ba2 O3 154.71(8) 1_545 . . 2_545 ? 
O1 Ba1 Ba2 O3 114.99(9) . . . 2_545 ? 
O1 Ba1 Ba2 O3 88.98(7) 2 . . 2_545 ? 
O2 Ba1 Ba2 O3 -58.45(9) 2_545 . . 2_545 ? 
O2 Ba1 Ba2 O3 -95.56(7) 1_545 . . 2_545 ? 
O7 Ba1 Ba2 O3 37.21(9) 2 . . 2_545 ? 
O7 Ba1 Ba2 O3 -138.78(10) . . . 2_545 ? 
Ba2 Ba1 Ba2 O3 98.95(5) 2 . . 2_545 ? 
O4 Ba1 Ba2 O9 -81.79(9) 2_545 . . . ? 
O4 Ba1 Ba2 O9 77.79(8) 1_545 . . . ? 
O1 Ba1 Ba2 O9 38.07(9) . . . . ? 
O1 Ba1 Ba2 O9 12.06(7) 2 . . . ? 
O2 Ba1 Ba2 O9 -135.37(9) 2_545 . . . ? 
O2 Ba1 Ba2 O9 -172.48(6) 1_545 . . . ? 
O7 Ba1 Ba2 O9 -39.70(9) 2 . . . ? 
O7 Ba1 Ba2 O9 144.31(9) . . . . ? 
Ba2 Ba1 Ba2 O9 22.04(5) 2 . . . ? 
O4 Ba1 Ba2 O4 159.58(12) 1_545 . . 2_545 ? 
O1 Ba1 Ba2 O4 119.86(11) . . . 2_545 ? 
O1 Ba1 Ba2 O4 93.85(9) 2 . . 2_545 ? 
O2 Ba1 Ba2 O4 -53.58(11) 2_545 . . 2_545 ? 
O2 Ba1 Ba2 O4 -90.69(9) 1_545 . . 2_545 ? 
O7 Ba1 Ba2 O4 42.09(11) 2 . . 2_545 ? 
O7 Ba1 Ba2 O4 -133.90(11) . . . 2_545 ? 
Ba2 Ba1 Ba2 O4 103.83(8) 2 . . 2_545 ? 
O4 Ba1 Ba2 C52 -3.88(10) 2_545 . . 2_545 ? 
O4 Ba1 Ba2 C52 155.71(9) 1_545 . . 2_545 ? 
O1 Ba1 Ba2 C52 115.98(10) . . . 2_545 ? 
O1 Ba1 Ba2 C52 89.97(8) 2 . . 2_545 ? 
O2 Ba1 Ba2 C52 -57.46(9) 2_545 . . 2_545 ? 
O2 Ba1 Ba2 C52 -94.56(8) 1_545 . . 2_545 ? 
O7 Ba1 Ba2 C52 38.21(10) 2 . . 2_545 ? 
O7 Ba1 Ba2 C52 -137.78(10) . . . 2_545 ? 
Ba2 Ba1 Ba2 C52 99.95(6) 2 . . 2_545 ? 
O4 Ba1 Ba2 Ba2 -2.69(8) 2_545 . . 5_576 ? 
O4 Ba1 Ba2 Ba2 156.89(6) 1_545 . . 5_576 ? 
O1 Ba1 Ba2 Ba2 117.16(8) . . . 5_576 ? 
O1 Ba1 Ba2 Ba2 91.16(5) 2 . . 5_576 ? 
O2 Ba1 Ba2 Ba2 -56.27(7) 2_545 . . 5_576 ? 
O2 Ba1 Ba2 Ba2 -93.38(5) 1_545 . . 5_576 ? 
O7 Ba1 Ba2 Ba2 39.39(8) 2 . . 5_576 ? 
O7 Ba1 Ba2 Ba2 -136.60(8) . . . 5_576 ? 
Ba2 Ba1 Ba2 Ba2 101.133(8) 2 . . 5_576 ? 
O3 Ba2 O1 C12 52.4(3) 6_586 . . . ? 
O8 Ba2 O1 C12 -27.3(2) . . . . ? 
O7 Ba2 O1 C12 -115.4(2) . . . . ? 
O10 Ba2 O1 C12 -145.6(2) . . . . ? 
O3 Ba2 O1 C12 131.1(2) 2_545 . . . ? 
O9 Ba2 O1 C12 57.8(2) . . . . ? 
O4 Ba2 O1 C12 162.2(2) 2_545 . . . ? 
C52 Ba2 O1 C12 145.5(2) 2_545 . . . ? 
Ba1 Ba2 O1 C12 -162.3(3) . . . . ? 
Ba2 Ba2 O1 C12 106.1(2) 5_576 . . . ? 
O3 Ba2 O1 Ba1 -145.36(10) 6_586 . . . ? 
O8 Ba2 O1 Ba1 134.95(8) . . . . ? 
O7 Ba2 O1 Ba1 46.82(7) . . . . ? 
O10 Ba2 O1 Ba1 16.70(13) . . . . ? 
O3 Ba2 O1 Ba1 -66.61(8) 2_545 . . . ? 
O9 Ba2 O1 Ba1 -139.93(9) . . . . ? 
O4 Ba2 O1 Ba1 -35.59(7) 2_545 . . . ? 
C52 Ba2 O1 Ba1 -52.21(8) 2_545 . . . ? 
Ba2 Ba2 O1 Ba1 -91.67(7) 5_576 . . . ? 
O4 Ba1 O1 C12 -163.6(3) 2_545 . . . ? 
O4 Ba1 O1 C12 8.1(3) 1_545 . . . ? 
O1 Ba1 O1 C12 -50.3(2) 2 . . . ? 
O2 Ba1 O1 C12 -133.5(8) 2_545 . . . ? 
O2 Ba1 O1 C12 124.7(3) 1_545 . . . ? 
O7 Ba1 O1 C12 -66.9(3) 2 . . . ? 
O7 Ba1 O1 C12 113.7(3) . . . . ? 
Ba2 Ba1 O1 C12 -32.5(3) 2 . . . ? 
Ba2 Ba1 O1 C12 158.8(3) . . . . ? 
O4 Ba1 O1 Ba2 37.63(7) 2_545 . . . ? 
O4 Ba1 O1 Ba2 -150.65(7) 1_545 . . . ? 
O1 Ba1 O1 Ba2 150.98(13) 2 . . . ? 
O2 Ba1 O1 Ba2 67.8(9) 2_545 . . . ? 
O2 Ba1 O1 Ba2 -34.08(9) 1_545 . . . ? 
O7 Ba1 O1 Ba2 134.35(7) 2 . . . ? 
O7 Ba1 O1 Ba2 -45.10(7) . . . . ? 
Ba2 Ba1 O1 Ba2 168.70(5) 2 . . . ? 
O3 Ba2 O7 Ba1 148.83(10) 6_586 . . . ? 
O8 Ba2 O7 Ba1 -130.11(10) . . . . ? 
O1 Ba2 O7 Ba1 -43.35(7) . . . . ? 
O10 Ba2 O7 Ba1 115.26(9) . . . . ? 
O3 Ba2 O7 Ba1 46.66(10) 2_545 . . . ? 
O9 Ba2 O7 Ba1 -52.11(12) . . . . ? 
O4 Ba2 O7 Ba1 27.42(7) 2_545 . . . ? 
C52 Ba2 O7 Ba1 36.00(8) 2_545 . . . ? 
Ba2 Ba2 O7 Ba1 79.18(10) 5_576 . . . ? 
O4 Ba1 O7 Ba2 -29.15(7) 2_545 . . . ? 
O4 Ba1 O7 Ba2 133.10(7) 1_545 . . . ? 
O1 Ba1 O7 Ba2 43.10(7) . . . . ? 
O1 Ba1 O7 Ba2 60.15(10) 2 . . . ? 
O2 Ba1 O7 Ba2 -131.98(7) 2_545 . . . ? 
O2 Ba1 O7 Ba2 -124.92(10) 1_545 . . . ? 
O7 Ba1 O7 Ba2 -128.51(7) 2 . . . ? 
Ba2 Ba1 O7 Ba2 106.08(7) 2 . . . ? 
C6 C1 C2 C3 0.9(4) . . . . ? 
C11 C1 C2 C3 -176.7(3) . . . . ? 
C1 C2 C3 C4 -0.1(4) . . . . ? 
C1 C2 C3 C31 180.0(3) . . . . ? 
C2 C3 C4 C5 -0.7(4) . . . . ? 
C31 C3 C4 C5 179.2(3) . . . . ? 
C3 C4 C5 C6 0.7(4) . . . . ? 
C3 C4 C5 C51 -178.4(3) . . . . ? 
C2 C1 C6 C5 -0.9(4) . . . . ? 
C11 C1 C6 C5 176.8(3) . . . . ? 
C4 C5 C6 C1 0.1(4) . . . . ? 
C51 C5 C6 C1 179.2(3) . . . . ? 
C6 C1 C11 C12 -95.4(3) . . . . ? 
C2 C1 C11 C12 82.2(4) . . . . ? 
Ba1 O2 C12 O1 -116.6(3) 1_565 . . . ? 
Ba1 O2 C12 C11 62.7(4) 1_565 . . . ? 
Ba2 O1 C12 O2 -69.5(4) . . . . ? 
Ba1 O1 C12 O2 135.0(3) . . . . ? 
Ba2 O1 C12 C11 111.3(2) . . . . ? 
Ba1 O1 C12 C11 -44.2(4) . . . . ? 
C1 C11 C12 O2 9.7(4) . . . . ? 
C1 C11 C12 O1 -171.0(3) . . . . ? 
C2 C3 C31 C32 -112.0(3) . . . . ? 
C4 C3 C31 C32 68.1(4) . . . . ? 
C3 C31 C32 O5 20.6(5) . . . . ? 
C3 C31 C32 O6 -158.8(3) . . . . ? 
C4 C5 C51 C52 -126.1(3) . . . . ? 
C6 C5 C51 C52 54.8(4) . . . . ? 
Ba1 O4 C52 O3 -156.4(5) 1_565 . . . ? 
Ba2 O4 C52 O3 -3.7(3) 2_565 . . . ? 
Ba1 O4 C52 C51 22.1(8) 1_565 . . . ? 
Ba2 O4 C52 C51 174.9(3) 2_565 . . . ? 
Ba1 O4 C52 Ba2 -152.7(7) 1_565 . . 2_565 ? 
Ba2 O3 C52 O4 -162.4(4) 6_585 . . . ? 
Ba2 O3 C52 O4 3.7(3) 2_565 . . . ? 
Ba2 O3 C52 C51 19.0(8) 6_585 . . . ? 
Ba2 O3 C52 C51 -174.8(2) 2_565 . . . ? 
Ba2 O3 C52 Ba2 -166.1(6) 6_585 . . 2_565 ? 
C5 C51 C52 O4 8.9(5) . . . . ? 
C5 C51 C52 O3 -172.5(3) . . . . ? 
C5 C51 C52 Ba2 130(2) . . . 2_565 ? 
 
_diffrn_measured_fraction_theta_max    0.997 
_diffrn_reflns_theta_full              27.48 
_diffrn_measured_fraction_theta_full   0.997 
_refine_diff_density_max    0.733 
_refine_diff_density_min   -0.664 
_refine_diff_density_rms    0.121 

#====END
